# Supplementary material for: An evaluation of the anti-angiogenic effect of the Korean medicinal formula “Sa-mi-yeon-geon-tang” in vitro and in ovo
Source: Springer Nature journal article supplement (doi:10.1186/s12906-015-0573-z), 2015-03-04

**Additional file 1. Determination of anti-angiogenic potential of SMYGT in vitro.** To investigate anti-angiogenic potential of SMYGT, HUVEC was exposed to SMYGT (0-400  $\mu\text{g/mL}$ ). PBS and sulforaphane (Sulfo, 5  $\mu\text{M}$ ) were treated as a vehicle and a positive control, respectively. Cells were observed under the inverted microscope at indicated magnifications. (A) tube formation (x 40), (B) cell growth (x 200), (C) cell mobility (x 100), (D) cell adhesion (x 100), and (E) cell invasion (x 100). At least three independent experiments were performed and representative images of each assay are shown.

(A) Tube formation assay

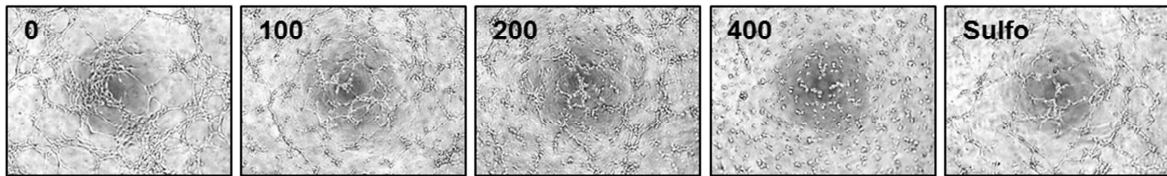

(B) Cell growth assay

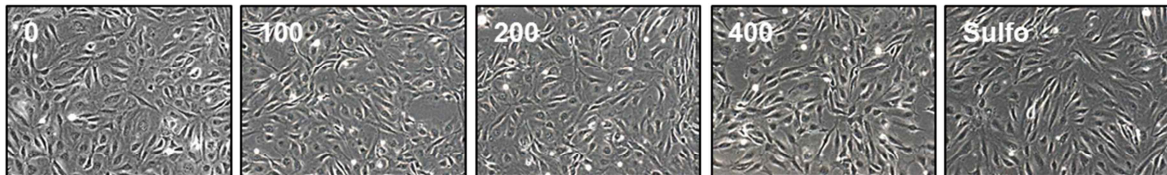

(C) Wound healing assay

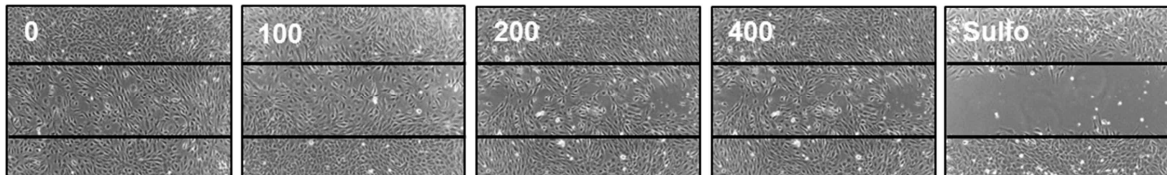

(D) Adhesion assay

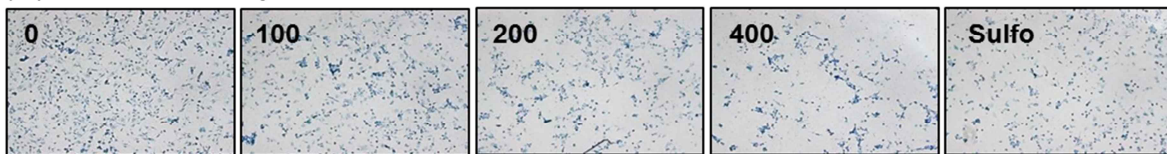

(E) Invasion assay

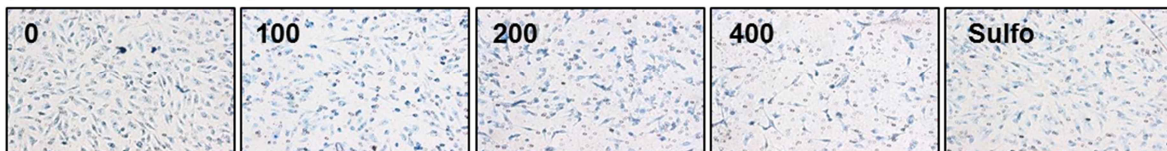

Supplement: MOESM1 [file 9755130]
